# Supplementary material for: Isotopic signatures of methane emission from oil and natural gas plants in southwestern China
Source: Copernicus journal article supplement (doi:10.5194/egusphere-2025-377), 2025-03-05
Supplement: Supplementary file 1 [file egusphere-2025-377-supplement.pdf]

*Support information for*

# **Isotopic signatures of methane emission from oil and natural gas plants in southwestern China**

Dingxi Chen<sup>1†</sup>, Yi Liu<sup>2†</sup>, Zetong Niu<sup>1</sup>, Ao Wang<sup>1</sup>, Pius Otwil<sup>1</sup>, Yuanyuan Huang<sup>1</sup>,  
Zhongcong Sun<sup>1</sup>, Xiaobing Pang<sup>3</sup>, Liyang Zhan<sup>4</sup>, Longfei Yu<sup>1\*</sup>

<sup>1</sup>Shenzhen Key Laboratory of Ecological Remediation and Carbon Sequestration,  
Institute of Environment and Ecology, Tsinghua Shenzhen International Graduate  
School, Tsinghua University, Shenzhen 518055, China

<sup>2</sup>Safety, Environment and Technology Supervision Research Institute of PetroChina  
Southwest Oil and Gas Field Company, Chengdu 610041, China

<sup>3</sup>College of Environment, Zhejiang University of Technology, Hangzhou, 310014,  
China

<sup>4</sup>key Laboratory of Global Change and Marine-Atmospheric Chemistry, Third  
Institute of Oceanography, Ministry of Natural Resources, Xiamen, 361005, China

\*Corresponding authors: longfei.yu@sz.tsinghua.edu.cn

<sup>†</sup>These authors contributed equally.

Manuscript Type: Research Article

## Contents

|                                                                                                                                    |           |
|------------------------------------------------------------------------------------------------------------------------------------|-----------|
| <b>1 Source partitioning with end-member mixing method .....</b>                                                                   | <b>3</b>  |
| <b>2 Sensitivity analysis with the updated source isotope signatures of CH<sub>4</sub> from the<br/>Chinese ONG industry .....</b> | <b>4</b>  |
| <b>Table S1 <math>\delta^{13}\text{C}</math> in part large ONG basins of China .....</b>                                           | <b>6</b>  |
| <b>Table S2 The information of samples from oil and natural gas production sites .....</b>                                         | <b>7</b>  |
| <b>Table S3 The results of HYSPLIT model and meteorological station at sites .....</b>                                             | <b>9</b>  |
| <b>Table S4 The results of source partitioning at sites.....</b>                                                                   | <b>10</b> |
| <b>Table S5 <math>\delta^{13}\text{C}</math> signatures of each CH<sub>4</sub> source<sup>1</sup> .....</b>                        | <b>11</b> |
| <b>References .....</b>                                                                                                            | <b>19</b> |

## 1 Source partitioning with end-member mixing method

In this study, we used CH<sub>4</sub> isotopes and mixing ratios as tracers. The contribution of atmospheric background, open surface area, and facility area to the CH<sub>4</sub> content of the air was calculated using the following formula:

$$\delta^{13}C_m = a \cdot \delta^{13}C_1 + b \cdot \delta^{13}C_2 + c \cdot \delta^{13}C_3 \quad (1)$$

$$C_m = a \cdot C_1 + b \cdot C_2 + c \cdot C_3 \quad (2)$$

$$1 = a + b + c \quad (3)$$

Where  $\delta^{13}C_m$ ,  $\delta^{13}C_1$ ,  $\delta^{13}C_2$ ,  $\delta^{13}C_3$  represent CH<sub>4</sub> isotopes in the air, the atmospheric background, the surface open area and the facility area, respectively; and a, b, c represent the contributions of the atmospheric background, the surface open area and the facility area, respectively;  $C_m$ ,  $C_1$ ,  $C_2$ ,  $C_3$  represent CH<sub>4</sub> mixing ratios in the air, the atmospheric background, the surface open area, and the facility area, respectively (results were shown in SI, Table S4). The values of a, b, and c can be obtained by combining equation (1), (2), (3).

## 2 Sensitivity analysis with the updated source isotope signatures of CH<sub>4</sub> from the Chinese ONG industry

As the isotopic signatures of major anthropogenic CH<sub>4</sub> sources may act as important benchmarks for estimating global emission budgets<sup>1</sup>, we applied a back-of-the-envelope calculation based on the revised isotope signatures for the Chinese ONG industry from our study. The computation processes are indicated as below:

$$Q_T = Q_{FF} + Q_{mic} + Q_{BB} \quad (4)$$

Where  $Q_T$ ,  $Q_{FF}$ ,  $Q_{mic}$ , and  $Q_{BB}$  represent the total CH<sub>4</sub> emission of global, fossil fuel, microbial, and biomass burning sources, respectively.

$$Q_T \cdot \delta^{13}C_Q = Q_{FF} \cdot \delta^{13}C_{FF} + Q_{mic} \cdot \delta^{13}C_{mic} + Q_{BB} \cdot \delta^{13}C_{BB} \quad (5)$$

Where  $\delta^{13}C_Q$  is the combined signal of  $\delta^{13}C$  emitted to the atmosphere.  $\delta^{13}C_{FF}$ ,  $\delta^{13}C_{mic}$ , and  $\delta^{13}C_{BB}$  represent the  $\delta^{13}C$  of global fossil fuel, microbial, and biomass burning sources, respectively.

The abundance of CH<sub>4</sub> isotopes ( $\delta^{13}C$ ) in the atmosphere is determined by the global sources of CH<sub>4</sub> and their contribution ratios, including fossil fuels (oil and natural gas, coal), biomass burning and microbial sources (wetland, ruminant, termites, rice and landfill/waste, etc.). Each source has different isotope signal values ( $\delta^{13}C$ ); details are show in SI, Table S5, and these data were obtained from the global CH<sub>4</sub> isotope database<sup>1</sup>. The global ground-based CH<sub>4</sub> and  $\delta^{13}C$  data (monthly average data) are available from the NOAA server (<https://gml.noaa.gov/dv/data/>), and results are shown in SI, Fig. S8. At the same time, global CH<sub>4</sub> emissions data are available from Saunio, M. et al.<sup>2</sup>.

In order to calculate the effect of this study's results on the global flux of fossil fuel, and microbial sources, we based on the following assumptions: (1) since CH<sub>4</sub> emissions from biomass sources are relatively small (less than 10%), the contribution ratio is constant; (2)  $\delta^{13}C_{mic}$  and  $\delta^{13}C_{BB}$  are also constant which from recent research; (3) the results of this study represent the  $\delta^{13}C$ -CH<sub>4</sub> (-21.95‰, the average of 11 stations) signature of the region from ONG, and we modified  $\delta^{13}C_{FF}$  based on our results and weighted (Eq. (6)). Because of the timeliness of the data, we calculated the  $Q_{FF}$  and  $Q_{mic}$  for the 2010-2019 decades with equation (4) and (5).

$$\delta^{13}\text{C}_{\text{FF}} = f_1 \cdot \delta^{13}\text{C}_1 + f_2 \cdot \delta^{13}\text{C}_{\text{FFG}} \quad (6)$$

Where  $f_1$  represents the ratio of  $\text{CH}_4$  emissions from China's ONG sector to global  $\text{CH}_4$  emissions from fossil fuel, and  $f_2=1-f_1$ .  $\delta^{13}\text{C}_{\text{FFG}}$  (-44‰) represents the average  $\delta^{13}\text{C}$  of global fossil fuel, and  $\delta^{13}\text{C}_1$  (-21.95‰) represents the average  $\delta^{13}\text{C}$  of Chinese ONG sector based on this study.

The detailed calculations are shown below:

The global  $\text{CH}_4$  emissions data from Sauniois, M. et al.<sup>2</sup>, for 2010-2019 decades, the total emission (excluding other natural sources) was 571 Tg  $\text{CH}_4 \text{ yr}^{-1}$ , the fossil fuel sources, the biomass and burning sources and the microbial sources emission was 117.5 Tg  $\text{CH}_4 \text{ yr}^{-1}$ , 27.5 Tg  $\text{CH}_4 \text{ yr}^{-1}$ , and 426 Tg  $\text{CH}_4 \text{ yr}^{-1}$ , respectively. So, the global contribution of fossil fuel sources, biomass and burning sources and microbial sources was 20.58%, 4.81% and 74.61%, respectively. In addition,  $\text{CH}_4$  emissions from China's ONG industry account for approximately 2.5% of global  $\text{CH}_4$  emissions from fossil sources<sup>3</sup>. The  $\delta^{13}\text{C}$  signatures of each  $\text{CH}_4$  source from SI, Table S5.

According equation (5), (6) and relevant data above:

$$\delta^{13}\text{C}_Q = 20.58\% \times (-44\%) + 4.81\% \times (-22.2\%) + 74.61\% \times (-62.2\%) = -56.53\%;$$

$$\text{and } \delta^{13}\text{C}_{\text{FF}} = 2.5\% \times (-44\%) + 97.5\% \times (-44\%) = -43.45\%;$$

Then, based on the relevant assumptions and equation (4) and (5), where  $\delta^{13}\text{C}_Q = -56.53\%$ ,  $\delta^{13}\text{C}_{\text{FF}} = -43.45\%$ .

From the calculations, we found that  $Q_{\text{FF}} = 19.97\%$ , indicated that the  $\text{CH}_4$  emissions from fossil fuel sources was overestimated by 0.61%, this corresponds to an overestimation of emissions by 3.47 Tg  $\text{CH}_4 \text{ yr}^{-1}$ . Microbial sources were underestimated to the same extent.

**Table S1  $\delta^{13}\text{C}$  in part large ONG basins of China**

| Basin               | Area                              | Production layer | $\delta^{13}\text{C}_{\text{CH}_4}$ (‰) | Reference |
|---------------------|-----------------------------------|------------------|-----------------------------------------|-----------|
| Tarim Basin         | Platform area of Tarim Basin      | O                | -42.6~ -32                              | 4         |
| Sichuan Basin       | Sichuan Basin                     | C, P, T          | -37~ -27                                |           |
| Ordos Basin         | Lower Paleozoic of Ordos Basin    | O                | -40.3~ -31                              |           |
| Liaohe Basin        | Western part of Liaohe Depression | E                | -54.8~ -31                              | 5         |
| Huanghua Depression | Huanghua Depression               | E                | -47.3~ -36.8                            | 6         |
| Tarim Basin         | Platform area of Tarim Basin      | ∈, O             | -45.4~ -32.0                            |           |
| Sichuan Basin       | Northeastern Sichuan Basin        | S                | -32.5~ -27.0                            |           |
| Songliao Basin      | Songliao                          | J-K              | -32.7~ -17.4                            | 7         |
| Sichuan Basin       | Wolonghe Field                    | T, P, C          | -34.5~ -31.69                           | 8         |
| Sichuan Basin       | Weiyuan Field                     | Z                | -32.38~ -32.37                          |           |
| Sichuan Basin       | East Sichuan Basin                | P, T             | -34.5~ -28.9                            |           |
| Sichuan Basin       | East Sichuan Basin                | T                | -32.35~ -29.52                          | 9         |
| Sichuan Basin       | Northeastern Sichuan Basin        | P, T             | -37.44~ -29.4                           | 10        |
| Zhujiangkou         | Panyu30-1                         | N                | -33.89                                  | 11        |
| Tarim Basin         | Tazhong Uplift                    | O                | -54.9~ -35.7                            | 12        |
| Sichuan Basin       | Sichuan Basin                     | Z, ∈, C, P, T    | -37.9~ -28.5                            | 13        |

**Table S2 The information of samples from oil and natural gas production sites**

| Site | Site No. | Sampling location | Time | No.    | Average $\delta^{13}\text{C}$ (‰) | Average $\text{CH}_4$ (ppm) |
|------|----------|-------------------|------|--------|-----------------------------------|-----------------------------|
| MX   | S1       | Pipeline area     | 4.13 | MX-01  | -47.24                            | 2.03                        |
|      |          | H: 100 m          | 4.13 | MX-02  | -47.92                            | 1.99                        |
|      |          | H: 50 m           | 4.13 | MX-03  | -47.58                            | 1.97                        |
|      |          | H: 100 m          | 4.13 | MX-04  | -46.88                            | 1.99                        |
|      |          | H: 50 m           | 4.13 | MX-05  | -46.84                            | 1.98                        |
|      |          | Production area   | 4.13 | MX-06  | -47.82                            | 2.01                        |
|      |          | Ground            | 4.13 | MX-07  | -42.27                            | 2.40                        |
|      |          | Production area   | 4.13 | MX-08  | -46.42                            | 2.05                        |
| SN   | S2       | H: 200 m          | 4.14 | SN-01  | -46.49                            | 1.98                        |
|      |          | H: 300 m          | 4.14 | SN-02  | -47.13                            | 1.88                        |
|      |          | H: 100 m          | 4.14 | SN-03  | -48.30                            | 1.97                        |
|      |          | Production area   | 4.14 | SN-04  | -31.61                            | 3.49                        |
|      |          | Production area   | 4.14 | SN-05  | -44.92                            | 2.07                        |
|      |          | H: 50 m           | 4.14 | SN-06  | -45.66                            | 2.02                        |
|      |          | H: 200 m          | 4.14 | SN-08  | -47.19                            | 2.00                        |
|      |          | Ground            | 4.14 | SN-09  | -47.07                            | 2.05                        |
|      |          | H: 50 m           | 4.14 | SN-11  | -46.97                            | 1.97                        |
|      |          | Pipeline area     | 4.14 | SN-12  | -30.97                            | 3.66                        |
|      |          | Pipeline area     | 4.14 | SN-13  | -44.49                            | 2.22                        |
| XBQ  | S3       | Ground            | 4.15 | HJB-01 | -45.51                            | 2.17                        |
|      |          | Pipeline area     | 4.15 | HJB-02 | -47.98                            | 2.01                        |
|      |          | H: 300 m          | 4.15 | HJB-03 | -47.02                            | 1.97                        |
|      |          | H: 200 m          | 4.15 | HJB-04 | -47.28                            | 2.06                        |
|      |          | H: 100 m          | 4.15 | HJB-05 | -48.11                            | 1.91                        |
|      |          | H: 50 m           | 4.15 | HJB-06 | -47.36                            | 1.99                        |
| XQ   | S4       | Ground            | 4.15 | SZG-01 | -45.10                            | 2.15                        |
|      |          | Pipeline area     | 4.15 | SZG-02 | -38.79                            | 2.61                        |
|      |          | Well              | 4.15 | SZG-03 | -45.76                            | 2.14                        |
|      |          | H: 300 m          | 4.15 | SZG-04 | -47.27                            | 1.96                        |
|      |          | H: 200 m          | 4.15 | SZG-05 | -45.97                            | 1.88                        |
|      |          | H: 100 m          | 4.15 | SZG-06 | -45.80                            | 2.03                        |
|      |          | H: 50 m           | 4.15 | SZG-07 | -45.69                            | 1.91                        |
| DQ   | S5       | Ground            | 4.16 | NMG-01 | -46.97                            | 2.00                        |
|      |          | Pipeline area     | 4.16 | NMG-02 | -44.58                            | 1.99                        |
|      |          | H: 300 m          | 4.16 | NMG-03 | -47.03                            | 1.98                        |
|      |          | H: 200 m          | 4.16 | NMG-04 | -46.76                            | 1.98                        |
|      |          | H: 100 m          | 4.16 | NMG-05 | -47.31                            | 1.98                        |
|      |          | H: 50 m           | 4.16 | NMG-06 | -46.47                            | 1.95                        |
| XM   | S6       | Ground            | 4.16 | XM-01  | -46.44                            | 1.98                        |

Table S2 continued

|       |     |               |      |          |        |        |
|-------|-----|---------------|------|----------|--------|--------|
|       |     | Pipeline area | 4.16 | XM-02    | -47.15 | 1.99   |
|       |     | H: 300 m      | 4.16 | XM-03    | -45.72 | 2.14   |
|       |     | H: 200 m      | 4.16 | XM-04    | -45.86 | 2.14   |
|       |     | H: 100 m      | 4.16 | XM-05    | -48.45 | 1.98   |
|       |     | H: 50 m       | 4.16 | XM-06    | -47.14 | 2.01   |
| QTCSN | S7  | Ground        | 4.17 | QTC-01   | -44.19 | 2.24   |
|       |     | Pipeline area | 4.17 | QTC-02   | -38.41 | 2.95   |
|       |     | H: 300 m      | 4.17 | QTC-03   | -45.37 | 2.05   |
|       |     | H: 200 m      | 4.17 | QTC-04   | -47.23 | 2.00   |
|       |     | H: 100 m      | 4.17 | QTC-05   | -45.86 | 2.15   |
|       |     | H: 50 m       | 4.17 | QTC-06   | -47.60 | 2.00   |
| QTCSZ | S8  | Ground        | 4.17 | QTCSZ-01 | -45.92 | 2.15   |
|       |     | Pipeline area | 4.17 | QTCSZ-02 | -39.81 | 2.45   |
|       |     | H: 300 m      | 4.17 | QTCSZ-03 | -45.13 | 2.05   |
|       |     | H: 200 m      | 4.17 | QTCSZ-04 | -46.18 | 2.14   |
|       |     | H: 100 m      | 4.17 | QTCSZ-05 | -45.45 | 2.14   |
|       |     | H: 50 m       | 4.17 | QTCSZ-06 | -44.55 | 2.09   |
| LHZ   | S9  | Ground        | 4.18 | LHZ-01   | -45.09 | 2.17   |
|       |     | Pipeline area | 4.18 | LHZ-02   | -45.43 | 2.17   |
|       |     | H: 300 m      | 4.18 | LHZ-03   | -47.16 | 1.98   |
|       |     | H: 200 m      | 4.18 | LHZ-04   | -44.28 | 2.13   |
|       |     | H: 100 m      | 4.18 | LHZ-05   | -45.90 | 2.02   |
|       |     | H: 50 m       | 4.18 | LHZ-06   | -47.89 | 1.99   |
| L1    | S10 | Ground        | 4.18 | L1-01    | -43.52 | 2.06   |
|       |     | Pipeline area | 4.18 | L1-02    | -45.06 | 2.19   |
|       |     | H: 300 m      | 4.18 | L1-03    | -44.75 | 2.15   |
|       |     | H: 200 m      | 4.18 | L1-04    | -44.47 | 2.04   |
|       |     | H: 100 m      | 4.18 | L1-05    | -46.26 | 2.13   |
|       |     | H: 50 m       | 4.18 | L1-06    | -45.06 | 2.02   |
| ZYZ   | S11 | Ground        | 4.19 | ZHZ-01   | -47.63 | 1.98   |
|       |     | Pipeline area | 4.19 | ZHZ-02   | -44.94 | 2.10   |
|       |     | H: 300 m      | 4.19 | ZHZ-03   | -45.36 | 2.00   |
|       |     | H: 200 m      | 4.19 | ZHZ-04   | -45.72 | 2.04   |
|       |     | H: 100 m      | 4.19 | ZHZ-05   | -46.58 | 1.99   |
|       |     | H: 50 m       | 4.19 | ZHZ-06   | -44.57 | 2.13   |
| Well  |     | Leak          | 4.11 | YJ-01    | -15.40 | 118.98 |
|       |     | Leak          | 4.11 | YJ-02    | -24.01 | 47.00  |
|       |     | Ground        | 4.11 | YJ-03    | -40.30 | 2.79   |
| Urban |     | Park          | 4.12 | GY-01    | -45.68 | 2.15   |
|       |     | Park          | 4.12 | GY-02    | -46.49 | 2.03   |
|       |     | Riverside     | 4.12 | GY-03    | -46.55 | 1.99   |
|       |     | Riverside     | 4.12 | GY-04    | -47.05 | 1.99   |



133

**Table S3 The results of HYSPLIT model and meteorological station at sites**

| sites | Ground           |                | H: 50 m          |                | H: 100 m         |                | H: 200 m         |                | H: 300 m         |                |
|-------|------------------|----------------|------------------|----------------|------------------|----------------|------------------|----------------|------------------|----------------|
|       | Wind speed (m/s) | Wind direction |
| S1    | 2.85/1.4         | 33.5°/155°     | 4.11             | 32°            | 3.54             | 32.9°          | 4.28             | 32.9°          | 4.00             | 38.2°          |
| S2    | 1.69/1.63        | 265.7°/169°    | 1.75             | 265.2°         | 1.82             | 265.0°         | 1.88             | 264.6°         | 1.34             | 263.3°         |
| S3    | 2.21/0.95        | 70.4°/180°     | 2.39             | 71.9°          | 2.60             | 74.8°          | 2.83             | 76.9°          | 3.08             | 86.0°          |
| S4    | 2.67/1.36        | 164.9°/183°    | 3.28             | 165.8°         | 2.76             | 167.5°         | 3.65             | 168.5°         | 2.86             | 170.8°         |
| S5    | 2.21/0.89        | 70.4°/157°     | 2.39             | 71.9°          | 2.60             | 74.8°          | 2.83             | 76.9°          | 3.08             | 86.0°          |
| S6    | 2.67/1.38        | 113.1°/160°    | 2.73             | 113.9°         | 2.76             | 115.8°         | 2.89             | 116.5°         | 2.86             | 117.5°         |
| S7    | 0.89/0.73        | 73.8°/118°     | 1.06             | 75°            | 1.18             | 94.5°          | 1.58             | 100.5°         | 1.93             | 125.2°         |
| S8    | 1.98/0.96        | 67°/207°       | 1.97             | 68°            | 2.03             | 67.6°          | 2.12             | 67°            | 1.93             | 70.4°          |
| S9    | 1.69/1           | 265.7°/213°    | 1.75             | 265.2°         | 1.82             | 265.0°         | 1.88             | 264.6°         | 1.34             | 263.3°         |
| S10   | 1.33/1.1         | 259.2°/194°    | 1.46             | 261.3°         | 1.50             | 264.0°         | 1.74             | 267.5°         | 1.68             | 270.9°         |
| S11   | 1.81/0.71        | 145.0°/228°    | 1.91             | 144.1°         | 2.05             | 143.2°         | 2.29             | 144.4°         | 2.39             | 142.2°         |

134

The table above shows data from the HYSPLIT model and meteorological stations. There were models and measurements data on the ground

135

and only simulations at high altitudes. “XX/XX” stands for “output of HYSPLIT model/measured of metrological station” values on the ground.

136

The measured values are expressed as mean values, and the two results were compared and analyzed (SI, Fig. 6), still has some correlation, although

137

the surface meteorological conditions are complex and changeable. This means that HYSPLIT's simulation results are reliable.

138

**Table S4 The results of source partitioning at sites**

| Site | Heights | Atmospheric<br>background<br>(%) | Ground (%) | Facility area<br>(%) |
|------|---------|----------------------------------|------------|----------------------|
| S1   | 50 m    | 50                               | 0          | 50                   |
|      | 100 m   | 45                               | 0          | 55                   |
| S2   | 50 m    | 94                               | 0          | 6                    |
|      | 100 m   | /                                | /          | /                    |
|      | 200 m   | 37                               | 63         | 0                    |
|      | 300 m   | 100                              | 0          | 0                    |
| S3   | 50 m    | 35                               | 11         | 54                   |
|      | 100 m   | /                                | /          | /                    |
|      | 200 m   | 0                                | 30         | 70                   |
|      | 300 m   | 59                               | 15         | 26                   |
| S4   | 50 m    | 94                               | 0          | 6                    |
|      | 100 m   | 62                               | 30         | 8                    |
|      | 200 m   | 96                               | 0          | 4                    |
|      | 300 m   | 85                               | 15         | 0                    |
| S5   | 50 m    | 48                               | 31         | 21                   |
|      | 100 m   | 34                               | 66         | 0                    |
|      | 200 m   | 19                               | 72         | 9                    |
|      | 300 m   | 14                               | 86         | 0                    |
| S6   | 50 m    | 100                              | 0          | 0                    |
|      | 100 m   | /                                | /          | /                    |
|      | 200 m   | /                                | /          | /                    |
|      | 300 m   | /                                | /          | /                    |
| S7   | 50 m    | /                                | /          | /                    |
|      | 100 m   | 80                               | 0          | 20                   |
|      | 200 m   | /                                | /          | /                    |
|      | 300 m   | 85                               | 0          | 15                   |
| S8   | 50 m    | 65                               | 1          | 34                   |
|      | 100 m   | 17                               | 73         | 10                   |
|      | 200 m   | 70                               | 0          | 30                   |
|      | 300 m   | 71                               | 4          | 25                   |
| S9   | 50 m    | /                                | /          | /                    |
|      | 100 m   | 53                               | 47         | 0                    |
|      | 200 m   | /                                | /          | /                    |
|      | 300 m   | /                                | /          | /                    |
| S10  | 50 m    | 38                               | 47         | 15                   |
|      | 100 m   | 18                               | 0          | 82                   |
|      | 200 m   | 27                               | 0          | 73                   |
|      | 300 m   | 32                               | 36         | 32                   |
| S11  | 50 m    | /                                | /          | /                    |

**Table S4 continued**

|       |    |    |    |
|-------|----|----|----|
| 100 m | 34 | 35 | 31 |
| 200 m | 23 | 11 | 66 |
| 300 m | 40 | 0  | 60 |

“/” represents the  $\delta^{13}\text{C}$  of target value (air) which is higher or lower than the source value (atmospheric background, open surface area and facility area), and it cannot be calculated, only qualitative analysis can be performed.

**Table S5  $\delta^{13}\text{C}$  signatures of each  $\text{CH}_4$  source<sup>1</sup>**

| sources         | Mean of $\delta^{13}\text{C}$ (‰) |
|-----------------|-----------------------------------|
| Fossil fuel     | -44                               |
| Microbial       | -62.2                             |
| Biomass burning | -22.2                             |

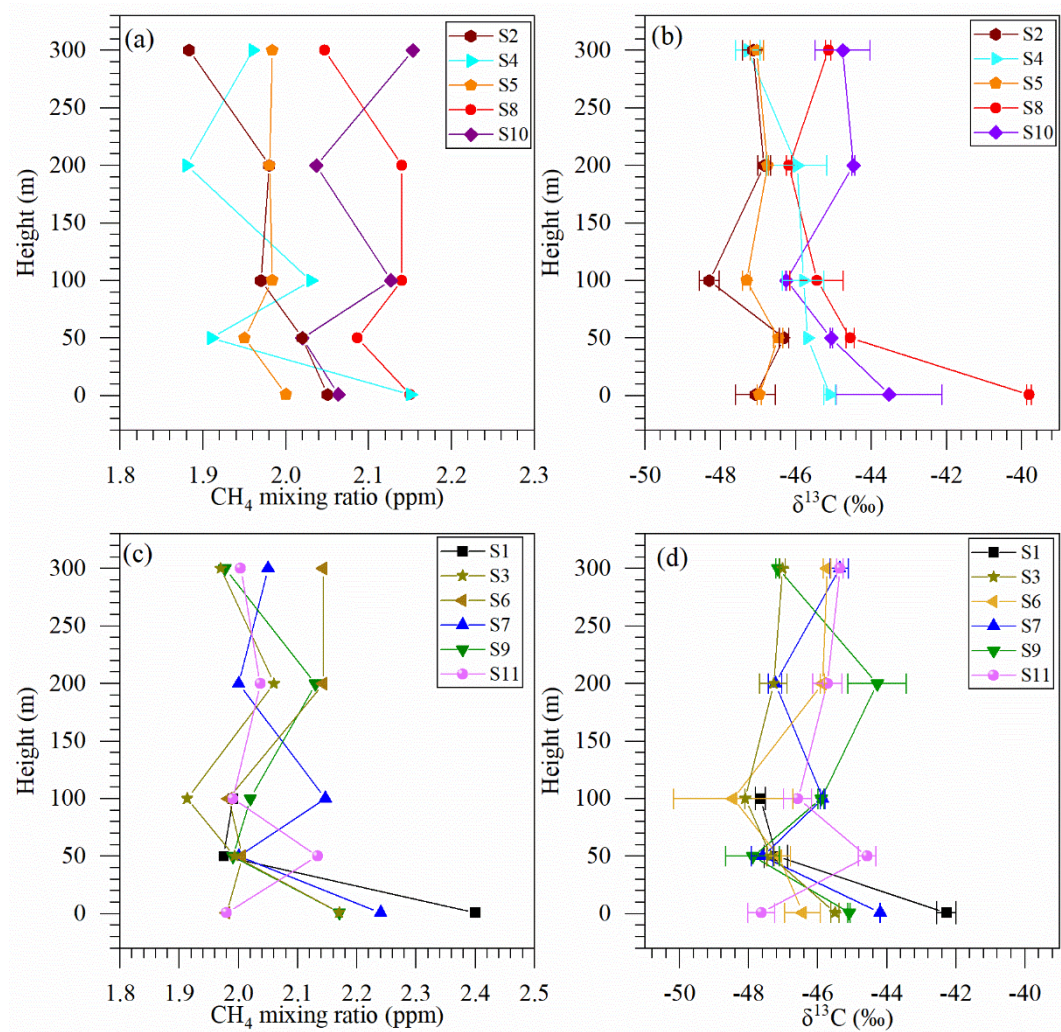

**Fig. S1** Vertical variation characteristics of CH<sub>4</sub> mixing ratios (a, c) and isotopes (b, d) at different field stations; because of the sampling accident, only 50 m and 100 m altitude data are obtained from S1 field station, and the other stations obtained full altitude data. The variation trend of CH<sub>4</sub> mixing ratio and isotope vertical profile of S1, S3, S6, S7, S9, S11 and S2, S4, S5, S8, S10 sites were shown in the picture (c, d) and (a, b), respectively.

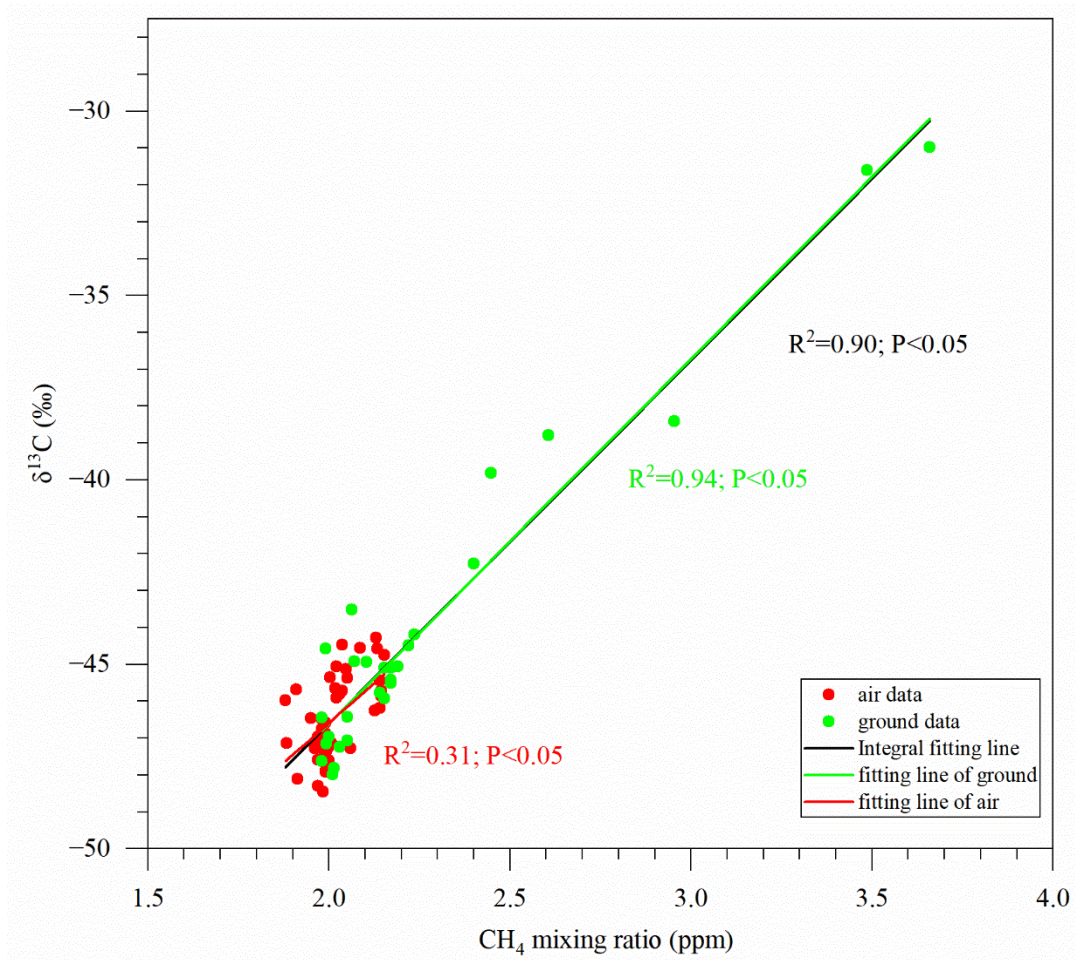

**Fig. S2** Linear fit of CH<sub>4</sub> mixing ratios to isotopes, data from 11 sites CH<sub>4</sub> samples. Green and red points represent air data and ground data, respectively; black, green and red lines represent integral fitting line, fitting line of ground and air, respectively; R<sup>2</sup> values are 0.90 (a), 0.94 (b), and 0.32 (c), P<0.05, respectively. The slopes of the black and green line are very close, almost coinciding.



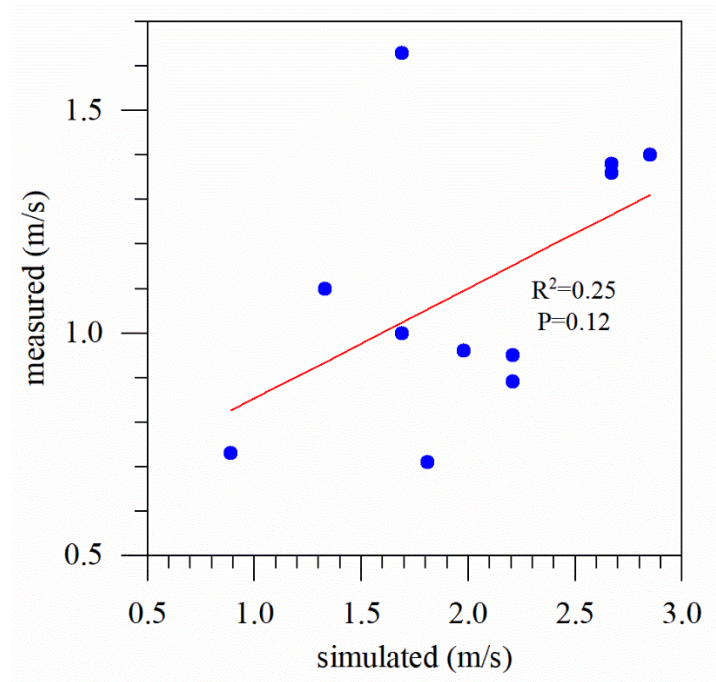

**Fig. S3** The fitting analysis of the wind speed based on the HYSPLIT model and meteorological station.

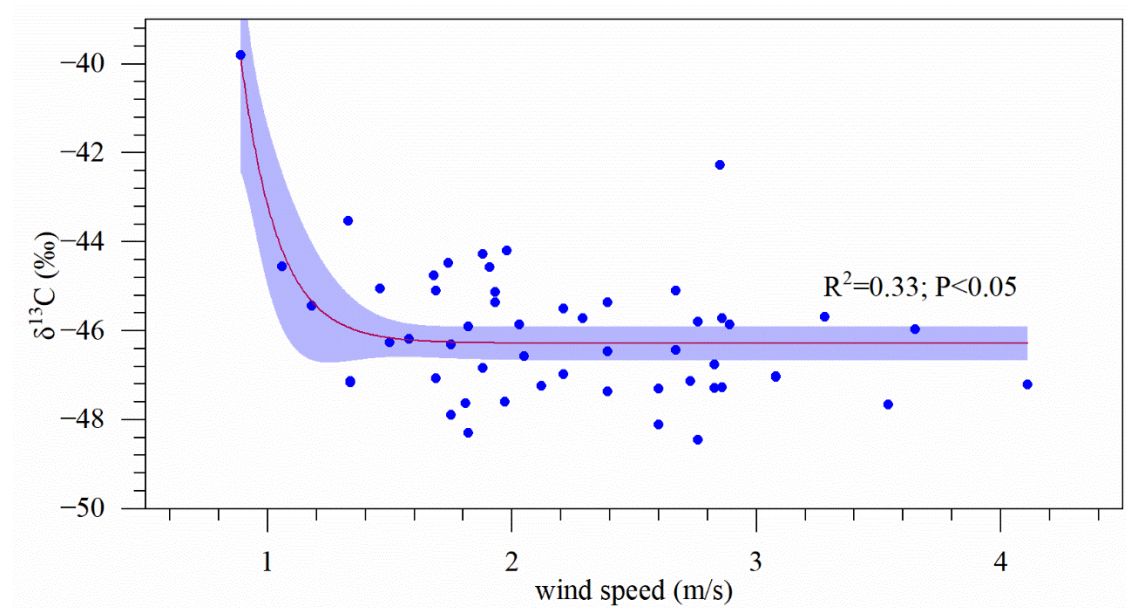

**Fig. S4** Exponential correlation between wind speed and isotopes of site, wind speed and isotope data at different altitudes are included, and  $R^2$  is 0.33,  $P<0.05$ . The blue area represents the 95% confidence interval and red lines represent fitting line.

Meteorological conditions, particularly wind direction, exert a significant influence on the distribution of CH<sub>4</sub> at the stations. The application of the HYSPLIT model is essential for understanding this phenomenon. The following example illustrates the impact of wind direction on CH<sub>4</sub> distribution at S7 station. During the investigation, a leak source was identified in the northeast direction of the facility area (CH<sub>4</sub> mixing ratios from 2.3 ppm to 13 ppm during the monitoring period). Given that the wind direction in the area where the S7 station is located was northeast, a significant increase in CH<sub>4</sub> mixing ratio was observed in the southwest direction of the facility area.

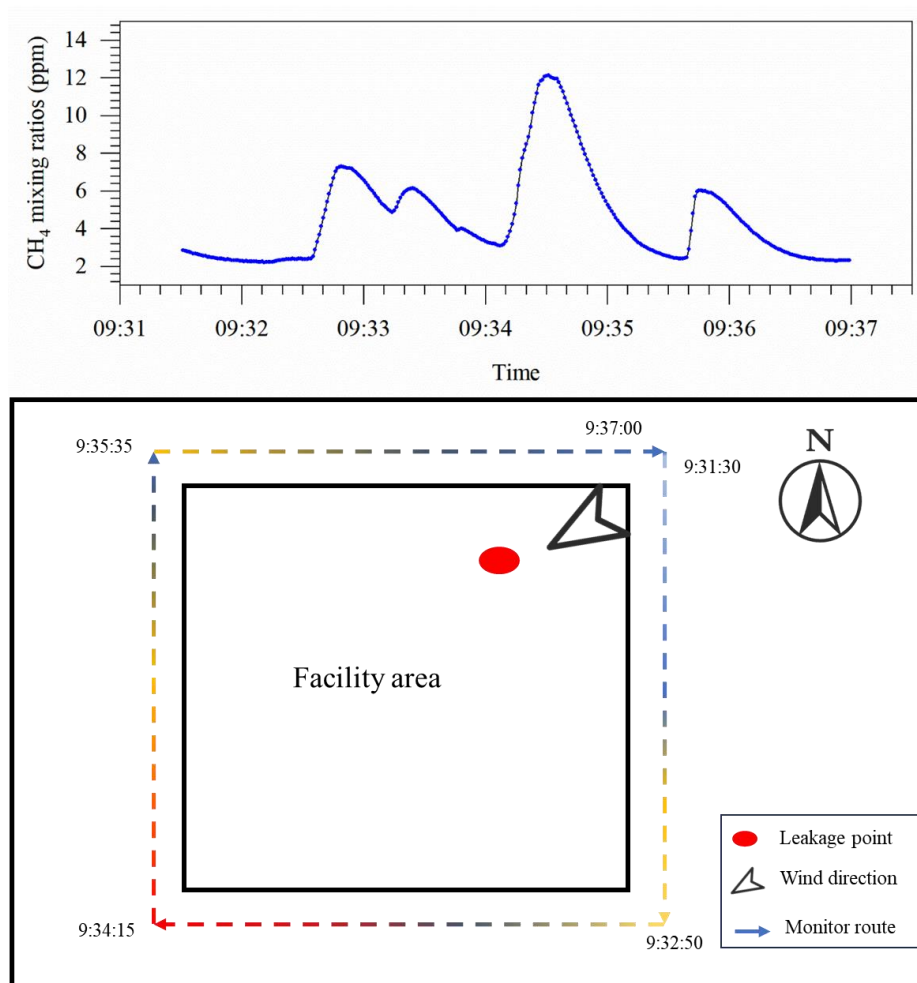

**Fig. S5** Impact of meteorological conditions on the distribution of CH<sub>4</sub> at station S7. The upper figure shows a time-mixing ratios relationship for monitoring, while the lower figure illustrates a schematic of site monitor (schematic provided for confidentiality reasons). The dashed line indicates the monitor route, with colors representing CH<sub>4</sub> mixing ratios: blue for low (2~3 ppm), orange for medium (3~7 ppm), and red for high (7~12 ppm).

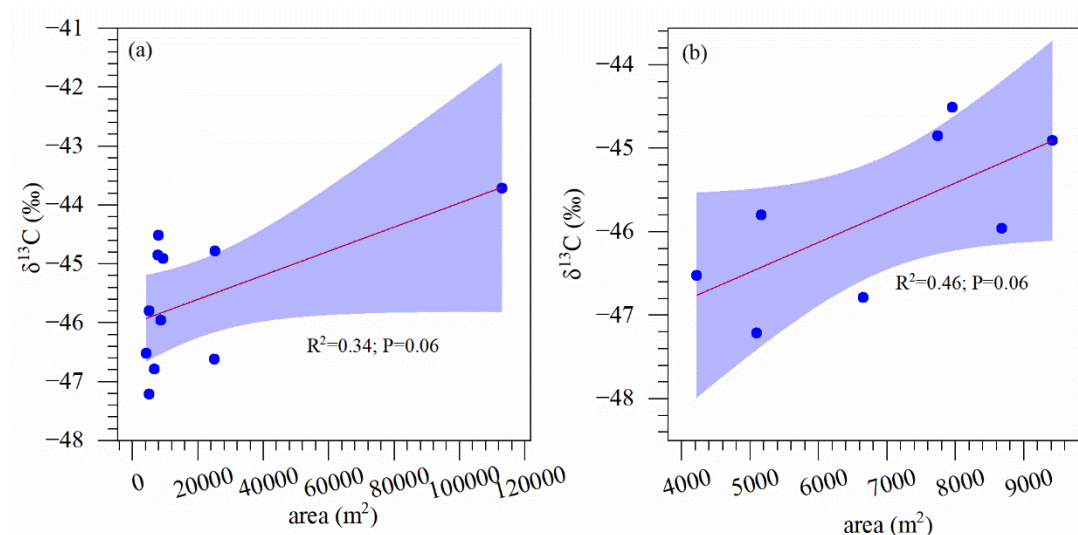

**Fig. S6** Correlation between size and isotopes of the site. The fitting relation of all field stations (a), and part of sites which area are less than 10000 m<sup>2</sup>;  $R^2$  and P values are 0.34 and 0.06 (a), 0.46 and 0.06 (b), respectively. The blue area represents the 95% confidence interval and red lines represent fitting line.



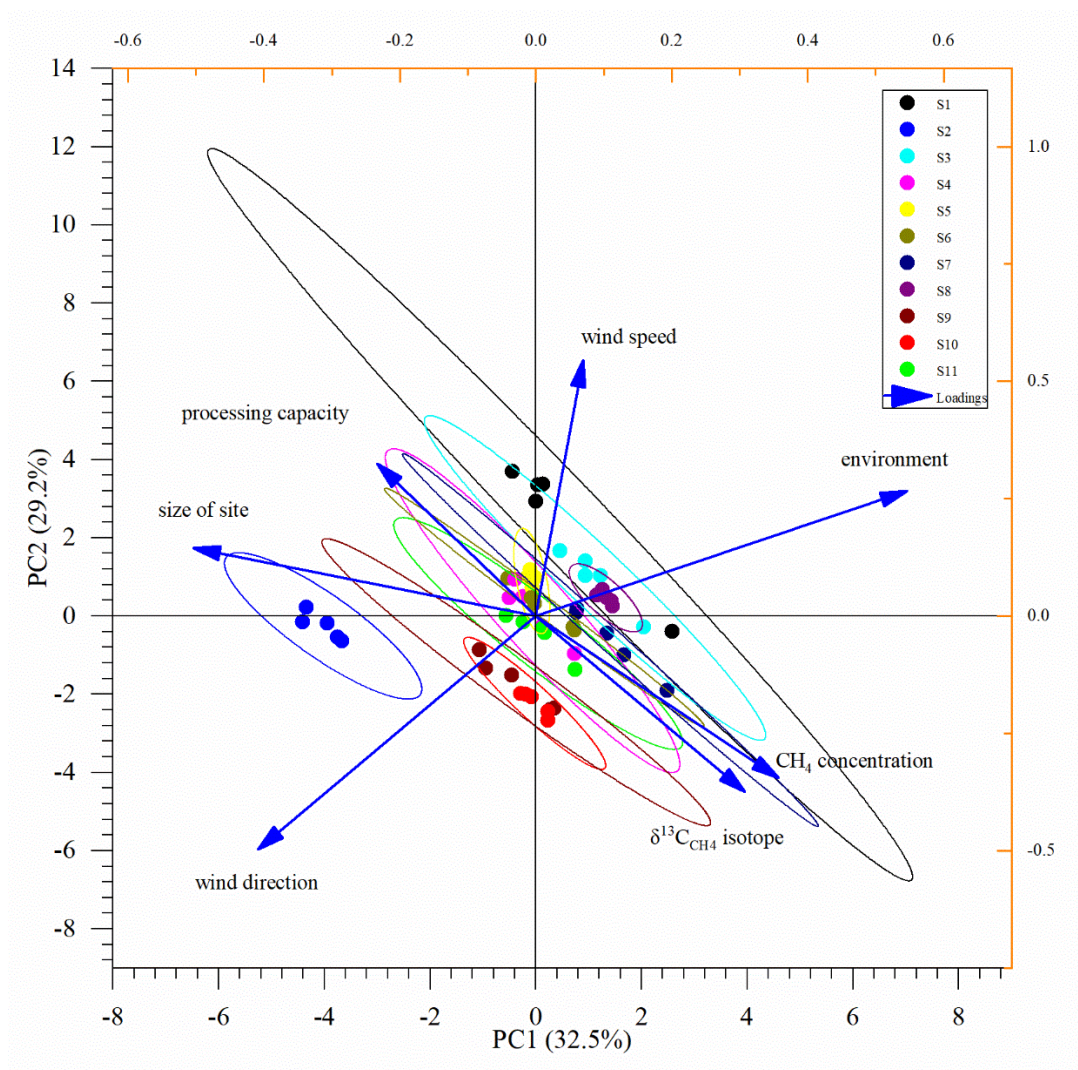

**Fig. S7** Principal Component Analysis (PCA) of influencing factors of CH<sub>4</sub> isotope ( $\delta^{13}\text{C}$ ) and mixing ratio in the field station. Including wind speed and direction, surrounding environment, size of the site and processing capacity.

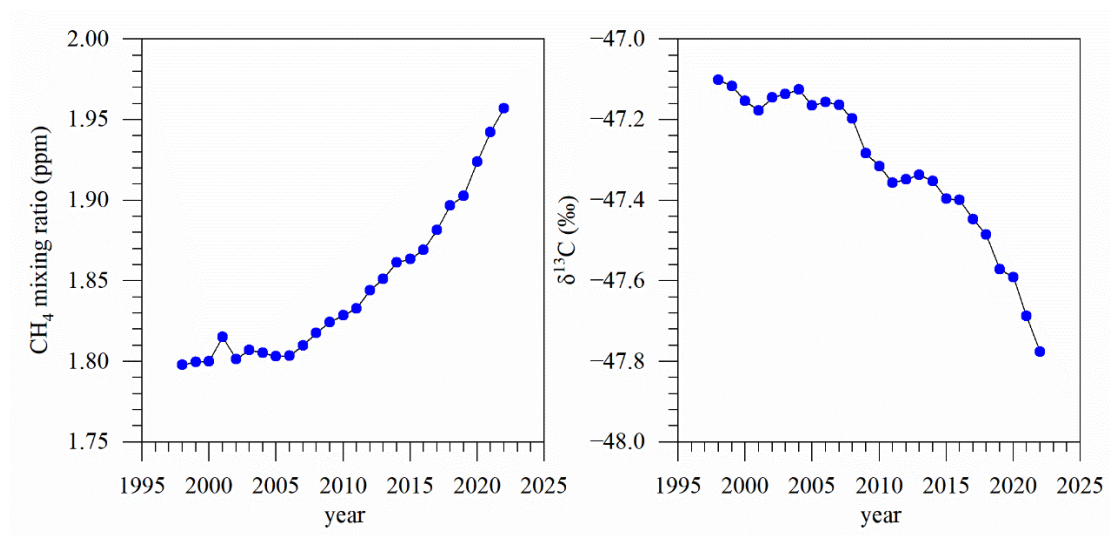

**Fig. S8** Global average CH<sub>4</sub> mixing ratios (left) and δ<sup>13</sup>C (right) from 1998 to 2022. The annual average values are available from the monthly mean data of the global observation sites, CH<sub>4</sub> mixing ratios data from 35 sites and δ<sup>13</sup>C data from 20 sites.

## References

- 1 Schwietzke, S. *et al.* Upward revision of global fossil fuel methane emissions based on isotope database. *Nature* **538**, 88-91 (2016).
- 2 Saunois, M. *et al.* Global Methane Budget 2000-2020. *Earth Syst. Sci. Data Discuss.* **2024**, 1-147 (2024). <https://doi.org/10.5194/essd-2024-115>
- 3 IEA. *Global Methane Tracker 2024*, <<https://www.iea.org/reports/global-methane-tracker-2024>> (2024).
- 4 Liu, Q. *et al.* Carbon and hydrogen isotopes of methane, ethane, and propane: A review of genetic identification of natural gas. *Earth-Science Reviews* **190**, 247-272 (2019).
- 5 Huang, S. *et al.* Multiple origins of the Paleogene natural gases and effects of secondary alteration in Liaohe Basin, northeast China: Insights from the molecular and stable isotopic compositions. *International Journal of Coal Geology* **172**, 134-148 (2017).
- 6 Wang, X. *et al.* Hydrogen isotope characteristics of thermogenic methane in Chinese sedimentary basins. *Organic Geochemistry* **83-84**, 178-189 (2015).
- 7 Yang, C. *et al.* Geochemical characteristics of pyrolysis gas from epimetamorphic rocks in the northern basement of Songliao Basin, Northeast China. *Science in China Series D: Earth Sciences* **51**, 140-147 (2008).
- 8 Cai, C., Zhang, C., He, H. & Tang, Y. Carbon isotope fractionation during methane-dominated TSR in East Sichuan Basin gasfields, China: A review. *Marine and Petroleum Geology* **48**, 100-110 (2013).
- 9 Cai, C. *et al.* Methane-dominated thermochemical sulphate reduction in the Triassic Feixianguan Formation East Sichuan Basin, China: towards prediction of fatal H<sub>2</sub>S concentrations. *Marine and Petroleum Geology* **21**, 1265-1279 (2004).
- 10 Hao, F. *et al.* Evidence for multiple stages of oil cracking and thermochemical sulfate reduction in the Puguang gas field, Sichuan Basin, China. *AAPG bulletin* **92**, 611-637 (2008).
- 11 Zhu, G., Wang, Z., Dai, J. & Su, J. Natural gas constituent and carbon isotopic composition in petroliferous basins, China. *Journal of Asian Earth Sciences* **80**, 1-17 (2014).
- 12 Wang, Y. *et al.* Origin of deep sour natural gas in the Ordovician carbonate reservoir of the Tazhong Uplift, Tarim Basin, northwest China: Insights from gas geochemistry and formation water. *Marine and Petroleum Geology* **91**, 532-549 (2018).
- 13 Zhang, S. *et al.* Unique chemical and isotopic characteristics and origins of natural gases in the Paleozoic marine formations in the Sichuan Basin, SW China: Isotope fractionation of deep and high mature carbonate reservoir gases. *Marine and Petroleum Geology* **89**, 68-82 (2018).
